# Supplementary material for: Factors controlling the CO intercalation of h-BN overlayers on Ru(0001)
Source: Royal Society of Chemistry journal article supplement (doi:10.1039/c6cp03660k), 2016-01-01
Supplement: c6cp03660k1.pdf [file c6cp03660k1.pdf]

# Factors controlling CO intercalation of h-BN overlayers on Ru(0001)

Aiyi Dong, Qiang Fu,\* Hao Wu, Mingming Wei, Xinhe Bao

State Key Laboratory of Catalysis, Dalian Institute of Chemical Physics, iChEM, the  
Chinese Academy of Sciences, Dalian 116023, P.R. China

E-mail: [qfu@dicp.ac.cn](mailto:qfu@dicp.ac.cn).

## Electronic Supporting Information

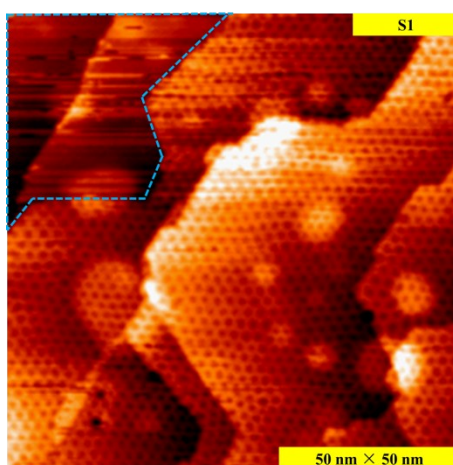

**Fig. S1** STM image of 0.75 ML h-BN/Ru(0001) surface exposed to  $1 \times 10^{-6}$  mbar CO without annealing. The region highlight by dotted line is from the bare Ru(0001) surface region, in which STM images show scratches. The image size is 50 nm  $\times$  50 nm.

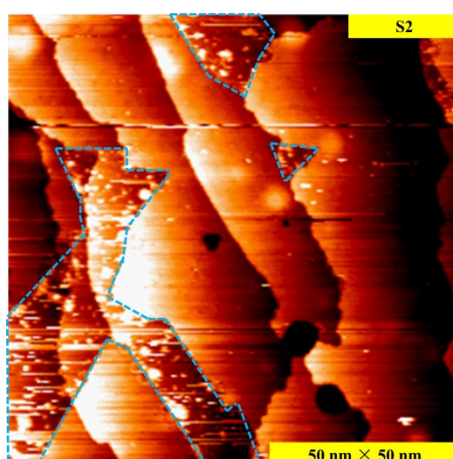

**Fig. S2** STM image of 0.75 ML h-BN/Ru(0001) surface exposed to 2 mbar CO without annealing. The regions highlight by dotted lines are from the bare Ru(0001) surface, in which STM images show scratches. The image size is 50 nm  $\times$  50 nm. The flat regions are h-BN covered-Ru(0001) surface.

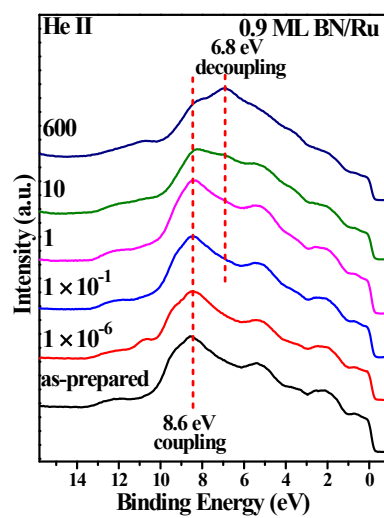

**Fig. S3** He-II UPS spectra of 0.9 ML h-BN/Ru(0001) surface exposed to CO gas with the indicated pressures (mbar) at room temperature. The co-existence of features at 8.6 and 6.8 eV
